# Supplementary material
Source: MDPI journal article supplement (https://www.mdpi.com/2073-4441/13/11/1477)
Supplement: s1 [file s1 › water-1226839-SI.pdf]

# Article

## Analysis of the Spatiotemporal Annual Rainfall Variability in the Wadi Cheliff Basin (Algeria) over the Period 1970 to 2018

Mohammed Achite <sup>1,2</sup>, Tommaso Caloiero <sup>3</sup>, Andrzej Wałęga <sup>4,\*</sup>, Nir Krakauer <sup>5</sup> and Tarek Hartani <sup>6</sup>

<sup>1</sup> Faculty of Nature and Life Sciences, Laboratory of Water & Environment, University Hassiba Benboual of Chlef, Chlef 02180, Algeria; m.achite@univ-chlef.dz

<sup>2</sup> National Higher School of Agronomy, ENSA, Hassan Badi 16200, El Harrach, Algiers 16004, Algeria

<sup>3</sup> National Research Council-Institute for Agricultural and Forest Systems in Mediterranean (CNR-ISAFO), 87036 Rende, Italy; tommaso.caloiero@cnr.it

<sup>4</sup> Department of Sanitary Engineering and Water Management, University of Agriculture in Krakow, Mickiewicza 24/28 Street, 30-059 Krakow, Poland

<sup>5</sup> Department of Civil Engineering and NOAA-CREST, The City College of New York, New York, NY 10031, USA; nkrakauer@ccny.cuny.edu

<sup>6</sup> Laboratory Management and Valorization of Agricultural and Aquatic Ecosystems, Morsli Abdellah Tipaza University Center, Oued Merzoug, Tipaza 42000, Algeria; rik\_hartani@yahoo.fr

\* Correspondence: andrzej.walega@urk.edu.pl

### Supplementary Material

**Citation:** Achite, M.; Wałęga, A.; Krakauer, N.; Hartani, T. Analysis of the Spatiotemporal Annual Rainfall Variability in the Wadi Cheliff Basin (Algeria) over the Period 1970 to 2018. *Water* **2021**, *13*, 1477. <https://doi.org/10.3390/w13111477>

Academic Editor: Matthew Therrell

Received: 02 May 2021

Accepted: 22 May 2021

Published: 25 May 2021

**Publisher's Note:** MDPI stays neutral with regard to jurisdictional claims in published maps and institutional affiliations.

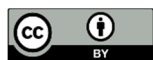

**Copyright:** © 2021 by the authors. Submitted for possible open access publication under the terms and conditions of the Creative Commons Attribution (CC BY) license (<http://creativecommons.org/licenses/by/4.0/>).

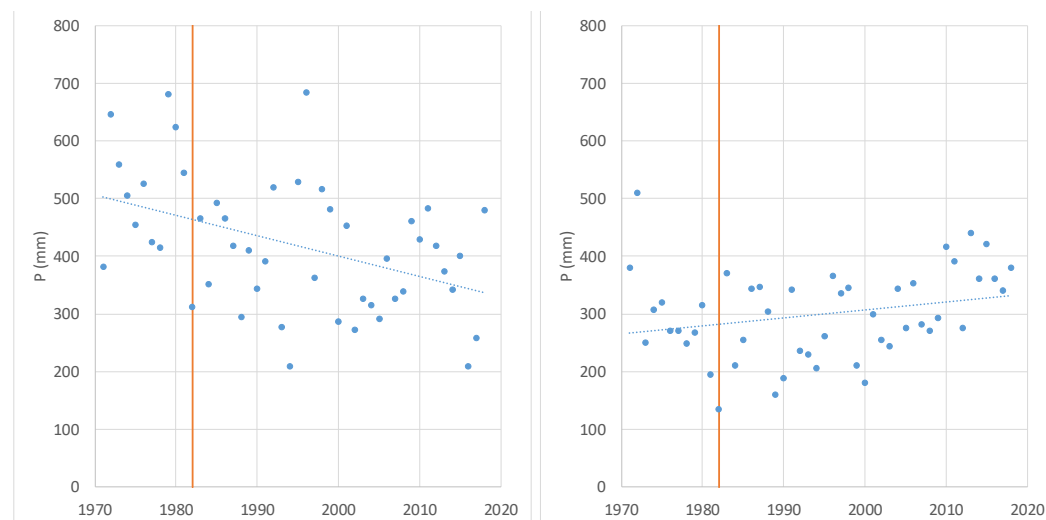

**Figure S1.** Example of negative and positive trends with change point (vertical orange line), for two characteristic stations.
